# Supplementary material
Source: PubMed Central journal article supplement (PMC4709124)
Supplement: NIHMS745952-supplement-supplemental.pdf [file NIHMS745952-supplement-supplemental.pdf]

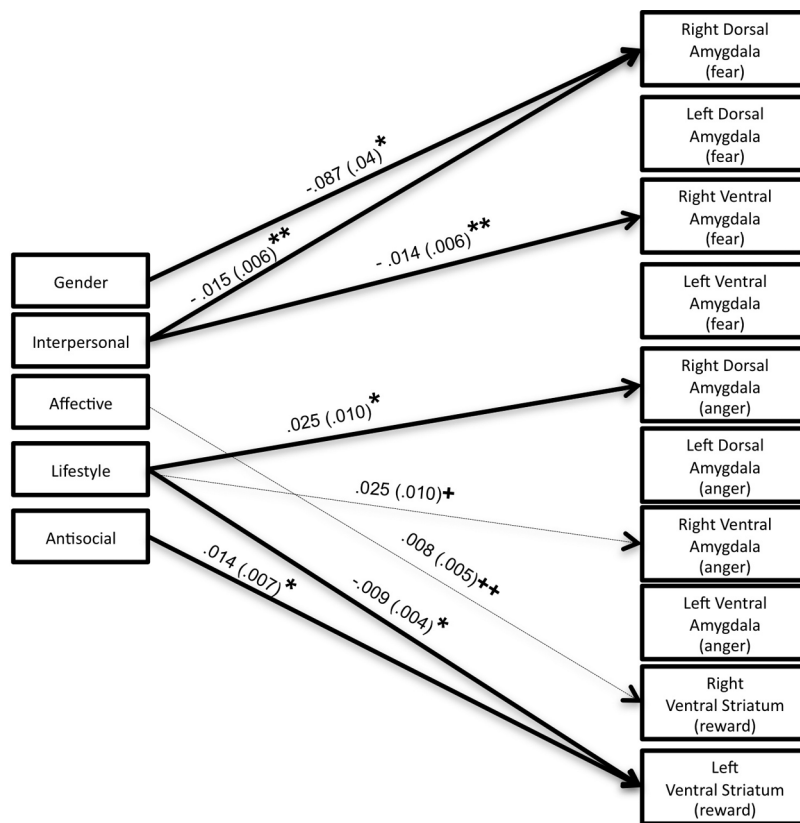

**Supplementary Figure 1.** Association between threat- (dorsal and ventral amygdala) and reward- related neural function and individual differences in psychopathic traits. \*\* p<0.01, \*p<0.05, +p=0.102, ++p=0.09.
